# Supplementary material
Source: PubMed Central journal article supplement (PMC4430391)
Supplement: NIHMS665818-supplement-supplement_1.pdf [file NIHMS665818-supplement-supplement_1.pdf]

Fukunaga-Kalabis\_Fig6

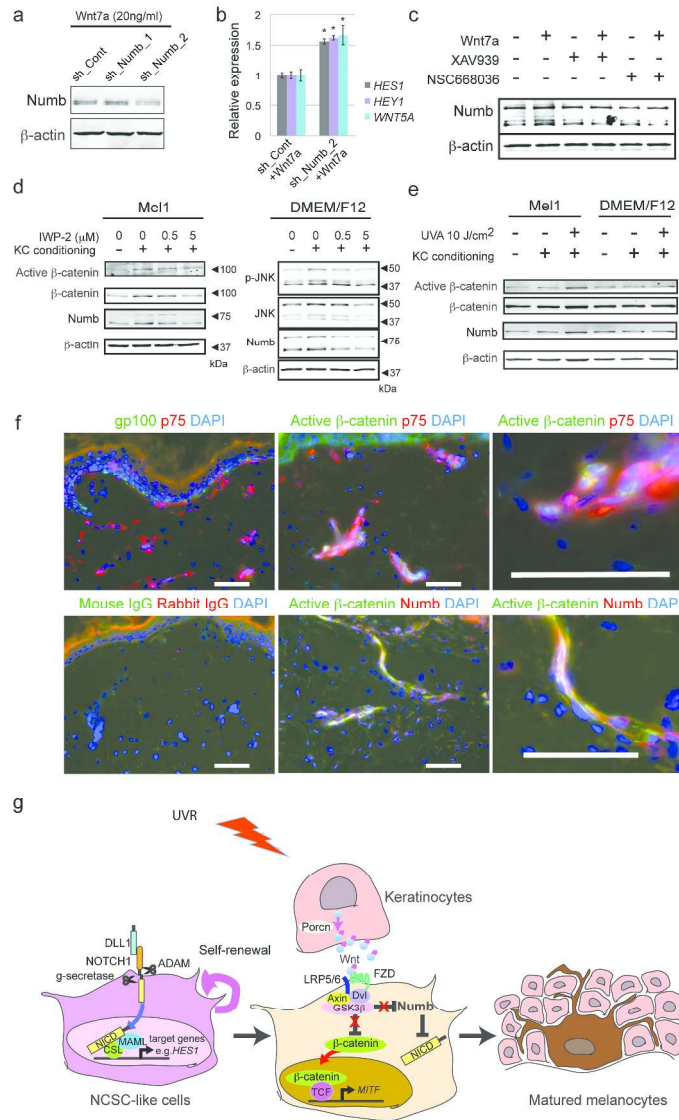

169x279mm (600 x 600 DPI)

*HES1*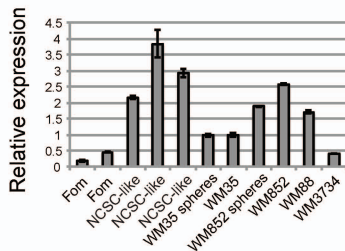*HEY1*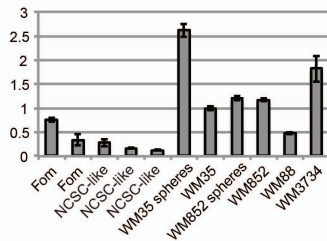*HES2*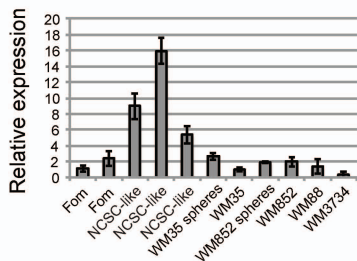*HEY2*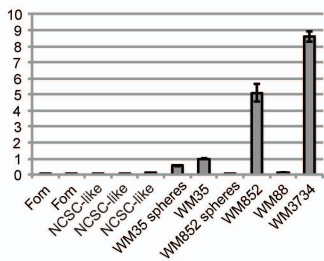*DLL1*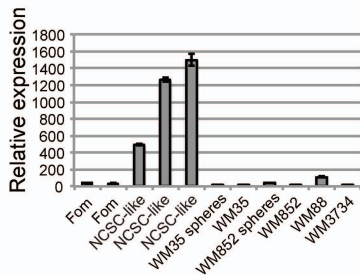*JAG1*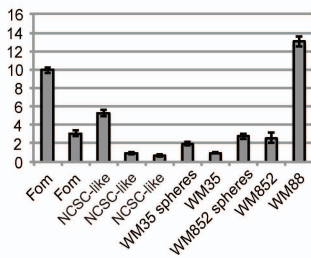

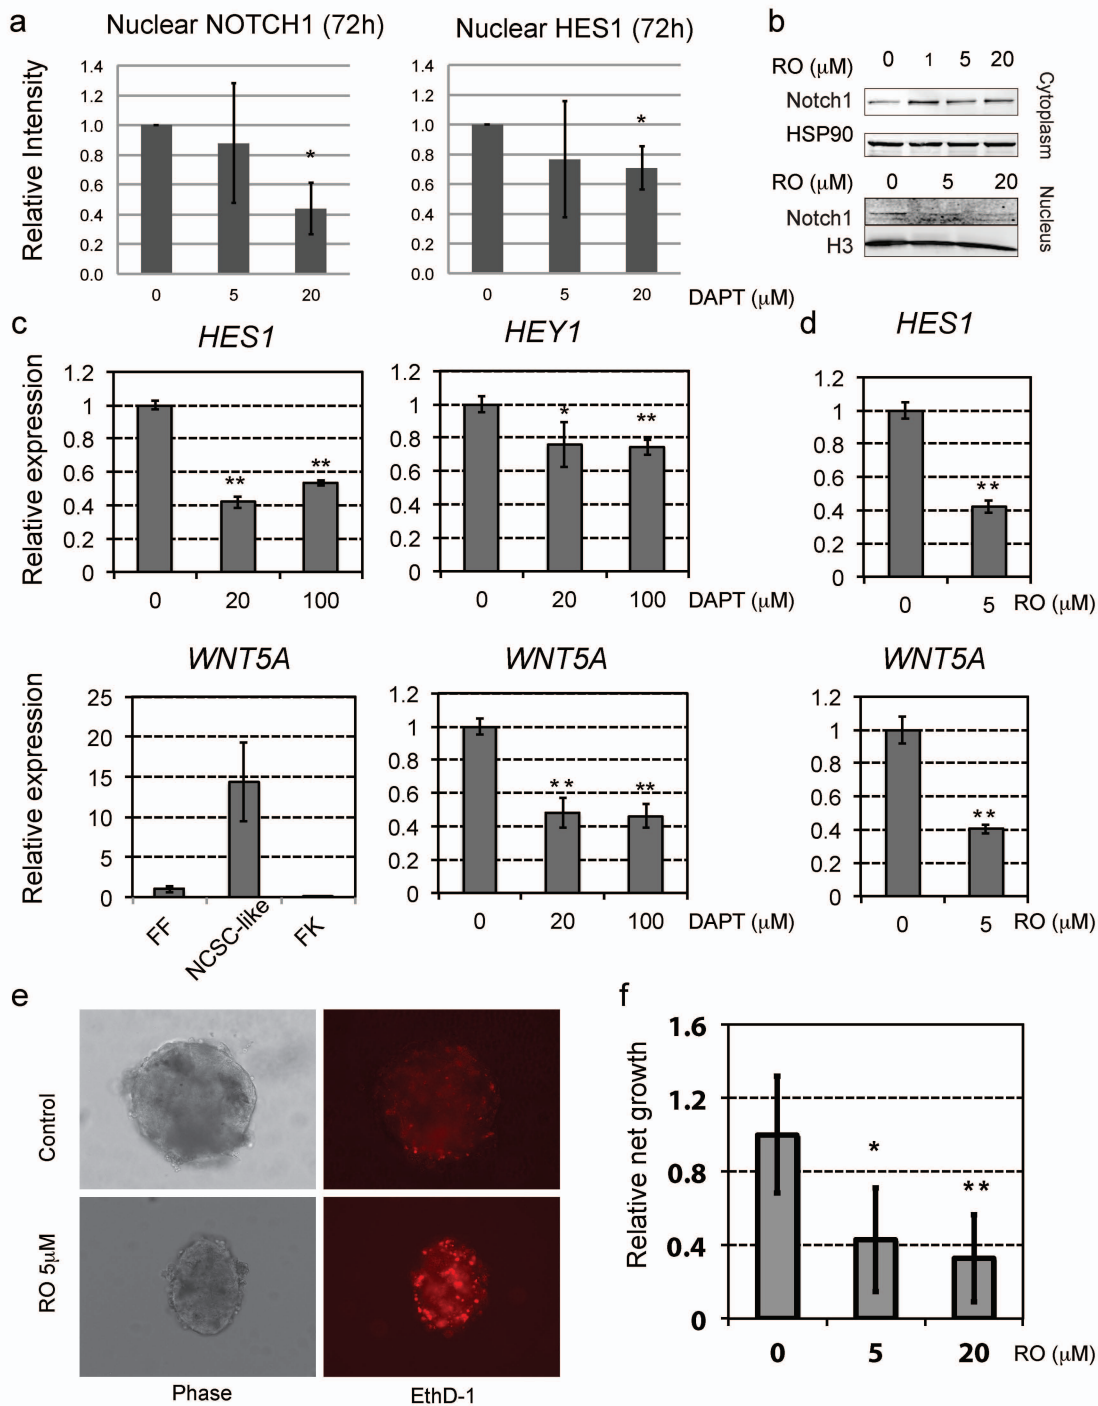

a

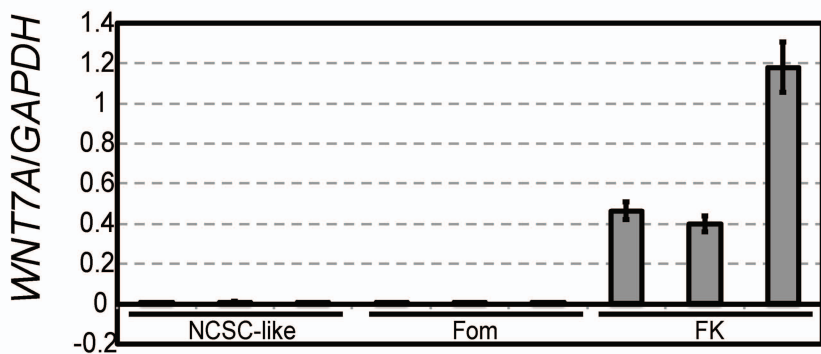

b

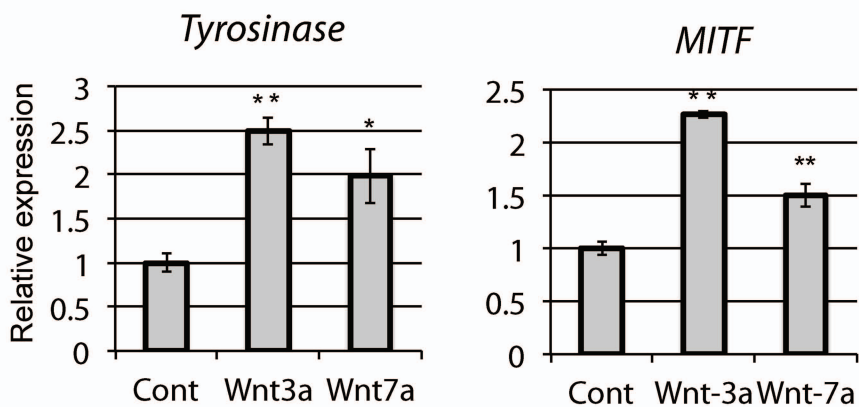

c

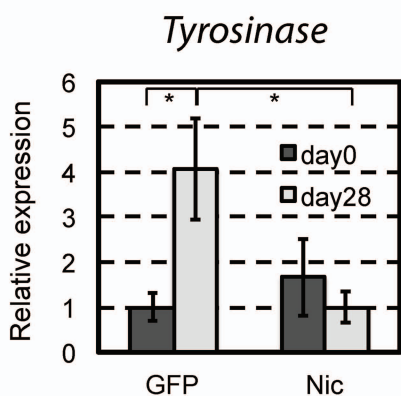

d

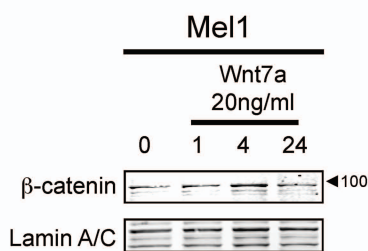

e

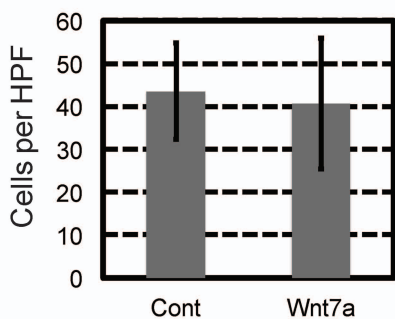

**a**

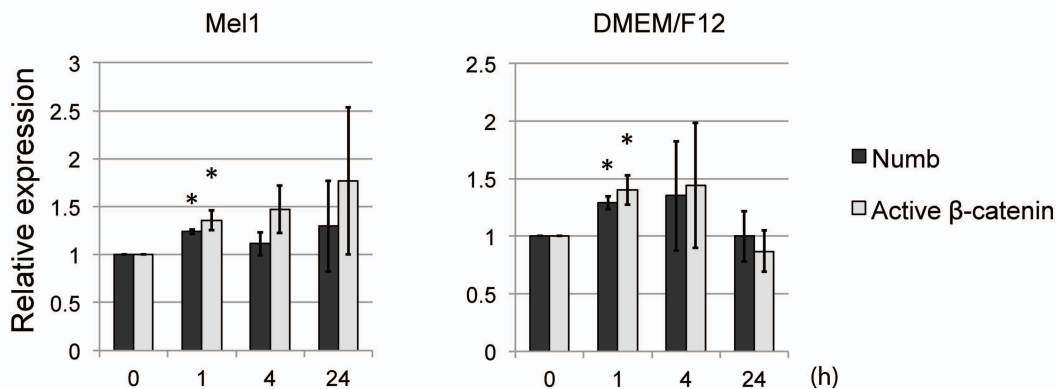

**b**

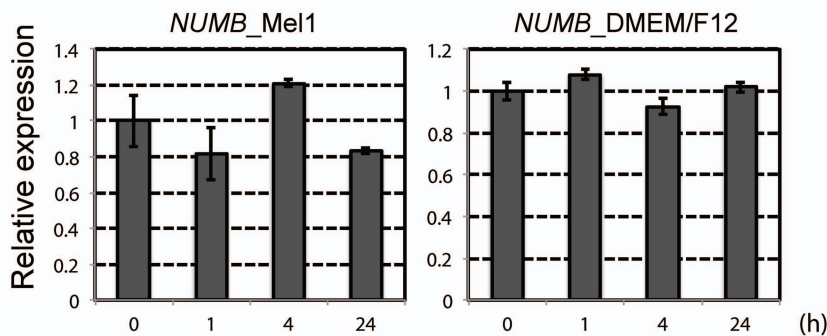

**c**

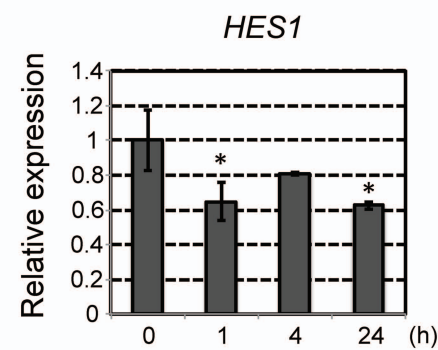

**d**

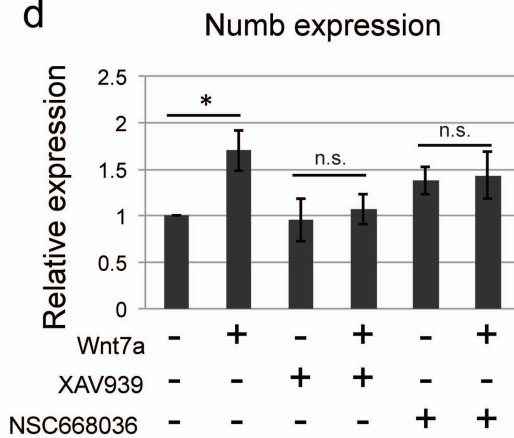

**e**

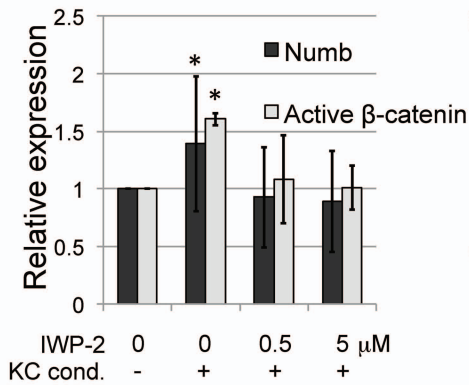

**f**

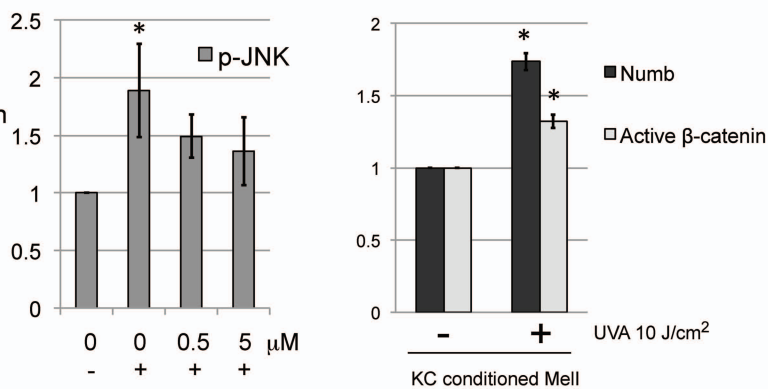

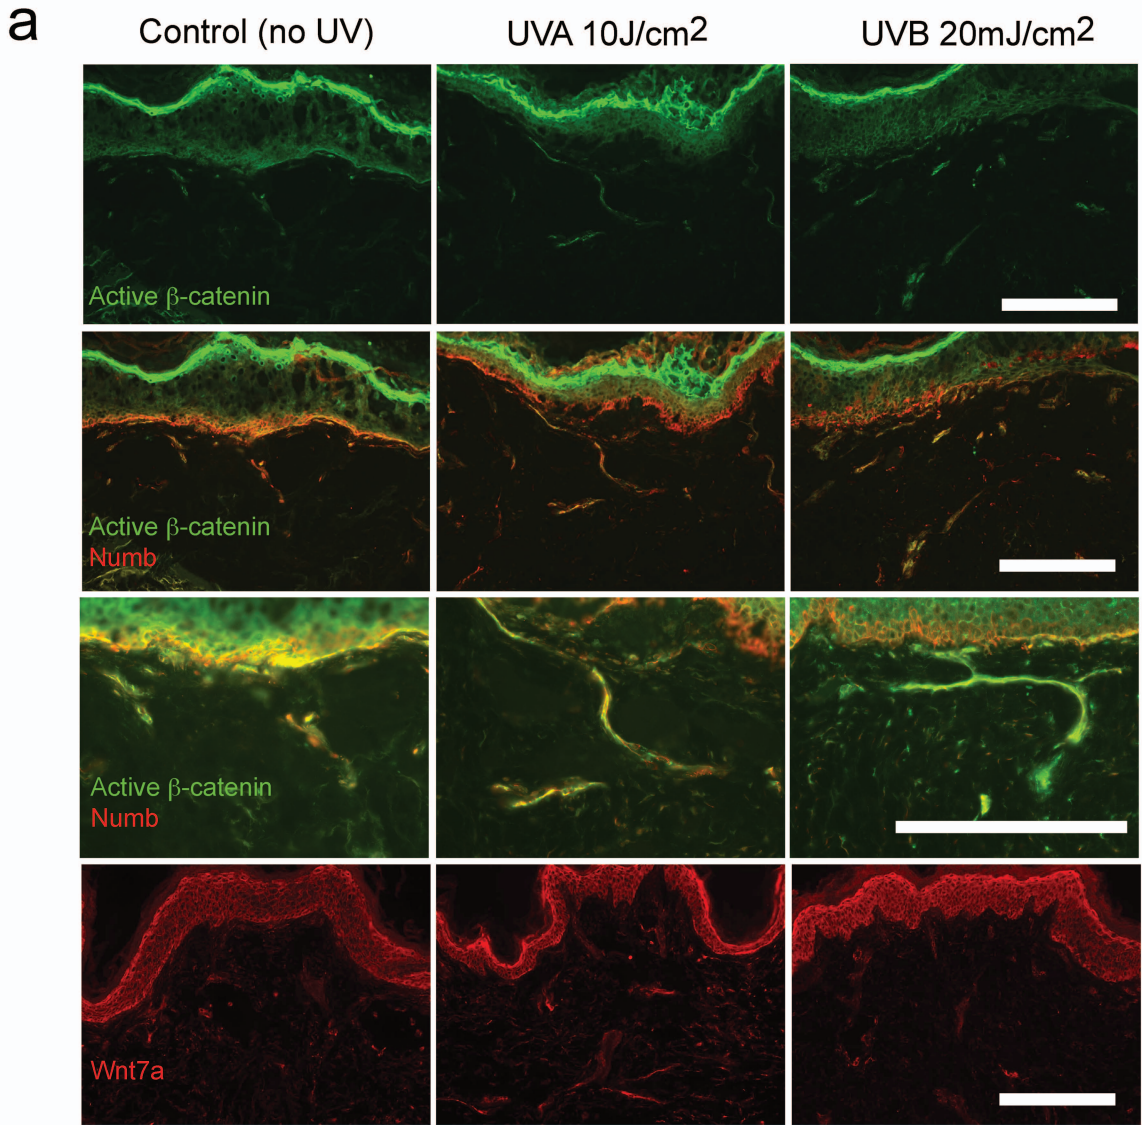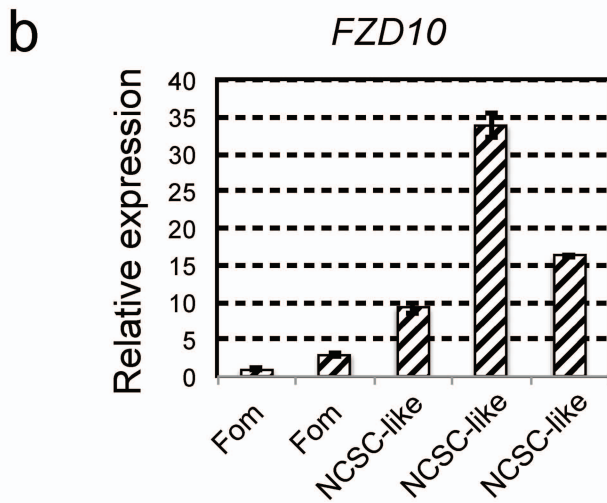

Supplementary Table 1

| Western blot   | Antibodies            | Vendor                                                                                      | Catalog Number | dilution |
|----------------|-----------------------|---------------------------------------------------------------------------------------------|----------------|----------|
|                | Notch1 (D6F11) XP®    | Cell signaling                                                                              | 4380           | 1000     |
|                | Notch2                | abcam                                                                                       | ab8927         | 1000     |
|                | Notch3                | abcam                                                                                       | ab23426        | 1000     |
|                | Notch4 (H-225)        | Santa Cruz                                                                                  | sc-5594        | 200      |
|                | HES1                  | Millipore                                                                                   | AB5702         | 1000     |
|                | Active-β-Catenin, 8E7 | Millipore                                                                                   | 05-665         | 1000     |
|                | β-Catenin             | BD Biosciences                                                                              | 610153         | 1000     |
|                | Phospho-SAPK/JNK (G9) | Cell signaling                                                                              | 9255           | 1000     |
|                | SAPK/JNK (56G8)       | Cell signaling                                                                              | 9258           | 1000     |
|                | Numb                  | abcam                                                                                       | ab14140        | 1000     |
|                | β-Actin               | Sigma-Aldrich                                                                               | A5441          | 5000     |
|                | HSP90 (C45G5)         | Cell signaling                                                                              | 4877           | 1000     |
|                | Lamin A/C             | Cell signaling                                                                              | 2032           | 1000     |
|                | Wnt-7a                | Novus Biologicals                                                                           | 23030002       | 2500     |
|                | Histone H3            | Cell signaling                                                                              | 4499           | 1000     |
| Immunostaining | Notch1                | abcam                                                                                       | ab8925         |          |
|                | HES1                  | Millipore                                                                                   | AB5702         |          |
|                | gp100 (HMB45)         | Dako                                                                                        | M0634          |          |
|                | TYRP1 (Mel-5)         | Covance                                                                                     | SIG-38150      |          |
|                | p75 (EP1039Y)         | abcam                                                                                       | ab52987        |          |
| qRTPCR primers | Target gene           | Forward sequence Reverse sequence references                                                |                |          |
|                | <i>HES1</i>           | GTG CAT GAA CG GTA TTA ACG CCC TCG CAC GT                                                   |                |          |
|                | <i>HES2</i>           | AGA ACT CCA AC CGG TCA TTT CCA GGA CGT CT                                                   |                |          |
|                | <i>HEY1</i>           | GCC GAG ATC CT TGC CGT ATG CAG CAT TTT CA                                                   |                |          |
|                | <i>HEY2</i>           | AGA TGC TTC AG CAA GAG CGT GTG CGT CAA AG                                                   |                |          |
|                | <i>DLL1</i>           | CAA CGT GGA CG TTG GGA CCC CCG TAG CCT CG                                                   |                |          |
|                | <i>JAG1</i>           | GTG GCT TGG AT TTG GTG GTG TT Borghese et al Stem Cells 2010 PMID: 20235098                 |                |          |
|                | <i>WNT7A</i>          | CAT AGG AGA AG CGG CAA TGA TG Nakatsu et al. Invest Ophthalmol Vis Sci. 2011 PMID: 21357396 |                |          |
|                | <i>WNT3A</i>          | CAA GAT TGG CA ATG AGC GTG TCA CTG CAA AG                                                   |                |          |
|                | <i>WNT3</i>           | CGA GTC GGC CT CGA GTC ACA GC Nakatsu et al. Invest Ophthalmol Vis Sci. 2011 PMID: 21357396 |                |          |
|                | <i>WNT11</i>          | CTG ACC TCA AG CGA GTT CCG AG Nakatsu et al. Invest Ophthalmol Vis Sci. 2011 PMID: 21357396 |                |          |
|                | <i>Tyrosinase</i>     | CTA GAA GGA TT CCT GTA CCT GGG ACA TTG TTC                                                  |                |          |
|                | <i>TYRP1</i>          | GCT TTT CTC AC GGC TCT TGC AAC ATT TCC G                                                    |                |          |
|                | <i>NUMB</i>           | CCG GCA TGC TCT TCT GGC TAA GA Jiao et al. Scand J Rheumatol. 2010 PMID: 20132067           |                |          |
|                | <i>MITF</i>           | TCAGGTGCAGAC GGCACCGGTGGCATGACATGAT                                                         |                |          |

**Supplementary Figure 1:** qRT-PCR showing that among Notch target genes, *HES1* and *HES2* are highly expressed by NCSC-like cells. Notch ligand delta-like 1 gene (*DLL1*) is highly expressed by NCSC-like stem cells, while another Notch ligand *JAG1* is expressed predominantly in melanocytes and in melanomas. mRNA levels of target genes were normalized to *GAPDH*.

**Supplementary Figure 2:** (a) Quantification of the Western blot analysis shown in Figure 1e. Intensities of protein bands derived from single membranes were quantified using Odyssey Image Studio software. Quantification was measured by taking the median signal, while the background was taken from the left/right side of each band. The amount of each protein was normalized to Lamin A/C. Data represent means  $\pm$  SD,  $n=3$ ,  $*p \leq 0.05$ . (b) Immunoblot analysis showing that treatment with the  $\gamma$ -secretase inhibitor RO4929097 blocks the nuclear translocation of Notch1 in NCSC-like cells. Blotting for HSP90 and Histone H3 serves as loading controls. (c) Top: qRT-PCR showing that 20  $\mu$ M DAPT treatment significantly decreases the expression of the Notch targets *HES1* and *HEY1* in NCSC-like stem cells. mRNA levels of target genes were normalized to *GAPDH*. Bottom: qRT-PCR showing that NCSC-like stem cells express the *WNT5A* gene at higher levels compared to human fibroblasts (FF) or human keratinocytes (FK). DAPT treatment significantly decreases the expression of the *WNT5A* gene in NCSC-like stem cells. mRNA levels of target genes were normalized to *GAPDH*. Data represent means  $\pm$  SD,  $n=4$ ,  $*p \leq 0.05$ ,  $**p \leq 0.001$ . (d) Top: qRT-PCR showing that 5  $\mu$ M RO4929097 treatment significantly decreases the expression of the Notch targets *HES1* and *WNT5A* in NCSC-like stem cells. mRNA levels of target genes were normalized to *GAPDH*. Data represent means  $\pm$  SD,  $n=4$ ,  $**p \leq 0.001$ . (e) Representative images of NCSC-like cells from control DMSO-treated and from 5  $\mu$ M RO4929097 treated cells on



the low-attachment surface. RO4929097 induces cell death, indicated by EthD-1 staining (red). (f) Histogram depicting the relative growth of secondary NCSC-like spheres. Data represent means  $\pm$  SD, n = 4. \* $p$  = 0.059, \*\* $p$   $\leq$  0.05.

**Supplementary Figure 3:** (a) qRT-PCR showing that human keratinocytes (FK) express the *WNT7A* gene, whereas NCSC-like stem cells and human melanocytes barely express *WNT7A*. mRNA levels of target genes were normalized to *GAPDH*. (b) qRT-PCR showing that *Wnt7a* induces the expression of melanocyte-specific genes *Tyrosinase* and *MITF* in a similar manner to Mel1 media supplemented with *Wnt3a*. mRNA levels of target genes were normalized to *GAPDH*. Data represent means  $\pm$  SD, n=3 \* $p$   $\leq$  0.05, \*\* $p$   $\leq$  0.0001. (c) qRT-PCR showing that the overexpression of the constitutively active form of Notch1 in NCSC-like cells suppresses the expression of *Tyrosinase* induced by Mel1 media supplemented with *Wnt7a*. mRNA levels of target genes were normalized to *GAPDH*. Data represent means  $\pm$  SE, n=5 \* $p$   $\leq$  0.05. GFP: control vector transduced NCSC-like cells, Nic: active Notch1 transduced NCSC-like cells. (d)  $\beta$ -catenin is detected in the nuclear fractions of *Wnt7a*-treated NCSC-like stem cells, suggesting that *Wnt7a* activates the canonical Wnt pathway in NCSC-like stem cells. Blotting for Lamin A/C serves as a loading control. (e) Quantification of the number of NCSC-like cells that migrated after 6 h with and without *Wnt7a*. Error bars indicate 1 SD of the average number of cells in five high power fields per Transwell® membrane. n=3.

**Supplementary Figure 4:** (a) Quantification of the Western blot analysis shown in Figure 4a. Intensities of protein bands derived from single membranes were quantified using Odyssey Image Studio software. The amount of each protein was normalized to  $\beta$ -

actin. Data represent means  $\pm$  SD,  $n=3$ ,  $*p \leq 0.05$ . (b) qRT-PCR showing that 20 ng/ml Wnt7a treatment does not increase the expression of *NUMB* within 24 h. mRNA levels of target genes were normalized to *GAPDH*. Data represent means  $\pm$  SD,  $n=4$ . (c) qRT-PCR showing that HES1 is down-regulated by Wnt7a treatment in NCSC-like stem cells. mRNA levels of target genes were normalized to *GAPDH*. Data represent means  $\pm$  SD,  $n=4$ ,  $*p \leq 0.05$ . (d) Quantification of the Western blot analysis shown in Figure 6c. Numb expression was normalized to  $\beta$ -actin. Data represent means  $\pm$  SD,  $n=3$ ,  $*p \leq 0.05$ . (e) Quantification of the Western blot analysis shown in Figure 6d. The amount of each protein was normalized to  $\beta$ -actin. Data represent means  $\pm$  SD,  $n=3$ ,  $*p \leq 0.05$ . (f) Quantification of the Western blot analysis shown in Figure 6e (NCSC-like cells treated with the Mel1 media conditioned from non-irradiated keratinocytes vs NCSC-like cells treated with the Mel1 media conditioned from UVA-irradiated keratinocytes). The amount of each protein was normalized to  $\beta$ -actin. Data represent means  $\pm$  SD,  $n=3$ ,  $*p \leq 0.05$ .

**Supplementary Figure 5:** (a) Immunofluorescent staining of human skin explants (from left, control without irradiation, 10 J/cm<sup>2</sup> of UVA, 20mJ/cm<sup>2</sup> of UVB). Skin explants were harvested 48 hours after UV irradiation. Active  $\beta$ -catenin positive cells (green) in the dermis co-expressed Numb (red), and their number increased in UV-irradiated samples. Scale bar = 200  $\mu$ m. (b) qRT-PCR showing that FZD10 is highly expressed by NCSC-like stem cells. mRNA levels of target genes were normalized to *GAPDH*.
